# Supplementary material for: APOE4&nbsp;Regulates Synaptic Function by Directly Modulating the SNARE&nbsp;Complex Assembly
Source: Research Square preprint supplement (doi:10.21203/rs.3.rs-380304/v1), 2021-04-09
Supplement: Supplementary file 1 [file d65edc6edf7905891c7a36d5.docx]

**Table S1. Antibodies and recombinant proteins used in the study.**

| **Antibody** | **Type** | **Dilution** | | **Source** | **Identifier** |
| --- | --- | --- | --- | --- | --- |
| Anti-ApoE | Mouse/mono | 1:500 | | abcam | Ab1906 |
| Anti-ApoE | Human binds | 1:1000 | | Meridian | K74180B |
| Anti-VAMP2 | Rabbit/mono | 1:1000 | | abcam | Ab181869 |
| Anti-SNAP25 | Rabbit/poly | 1:1000 | | abcam | Ab41455 |
| Anti-syntaxin-1 | Rabbit/poly | 1:1000 | | abcam | Ab41453 |
| Anti-syntaxin-1 | Mouse/mono | 1:500 | | Santa Cruz | sc12736 |
| Anti-FLAG | Mouse/mono | 1:100 (IP) | | Abbkine | A02010 |
| Anti-FLAG | Rabbit/poly | 1:1000 | | Abbkine | A02011 |
| Anti-HA | Mouse/mono | 1:100 (IP) | | Abbkine | A02040 |
| Anti-HA | Rabbit/poly | 1:1000 | | Abbkine | A02041 |
| Normal mouse IgG | Mouse | 1:100 (IP) | | Santa Cruz | Sc-2025 |
| Anti-GAPDH | Rabbit/ mono | 1:1000 | | Cell Signaling Technology | Cst2118 |
| Anti-alpha Tubulin | Rabbit/poly | 1:1000 | | abcam | Ab4074 |
| **Recombinant proteins** | | | **Source** | | **Identifier** |
| Recombinant human ApoE3 protein | | | PeproTech | | Cat# 350-02 |
| Recombinant human ApoE4 protein | | | PeproTech | | Cat# 350-04 |
| Recombinant human VAMP2 protein | | | Novusbio | | NBC1-18335 |
| Recombinant human SNAP-25 protein | | | Novusbio | | NBC1-18333 |
| Recombinant human Syntaxin 1a protein | | | Novusbio | | NBP2-52366 |
